# Supplementary material for: Selective ratiometric detection of mercury(ii) ions in water with an acridizinium-based fluorescent probe
Source: Royal Society of Chemistry journal article supplement (doi:10.1039/b821830g), 2009-01-01
Supplement: b821830g.pdf [file b821830g.pdf]

# Selective Ratiometric Detection of Mercury(II) Ions in Water with an Acridizinium-Based Fluorescent Probe

Maoqun Tian and Heiko Ihmels \*

*Universität Siegen, Organische Chemie II, Adolf-Reichwein-Str. 2, D-57068 Siegen, Germany*

*ihmels@chemie.uni-siegen.de*

## Supporting Information

|                                                                                                      |         |
|------------------------------------------------------------------------------------------------------|---------|
| General Instrumentations and Materials                                                               | S2      |
| Synthetic details and characterization data for <b>1c</b>                                            | S3      |
| Spectrophotometric measurements and spectrophotometric properties of <b>1c</b>                       | S4-S6   |
| <sup>1</sup> H-, <sup>13</sup> C-NMR, COSY, HSQC spectra of <b>1c</b> in MeOD                        | S7-S9   |
| <sup>1</sup> H-NMR of 9-aminoacridizinium chloride in D <sub>2</sub> O                               | S10     |
| <sup>1</sup> H-, <sup>13</sup> C-NMR, COSY, HSQC, HMBC spectra of <b>1c</b> in D <sub>2</sub> O      | S10-S12 |
| <sup>1</sup> H-NMR, COSY, HSQC, HMBC spectra of <b>1c</b> + Hg(OAc) <sub>2</sub> in D <sub>2</sub> O | S13-S14 |

**General Instrumentations and Materials.** All commercially available chemicals were reagent grade and used without further purification. The melting point were determined with a Büchi 510K melting point apparatus and are not corrected. Mass spectra (ESI in the positive-ion mode, source voltage 6 kV) were recorded with a Finnigan LCQ Deca instrument; only  $m/z$  values in the range of 100–2000 units were analyzed. NMR spectra were measured on Bruker Avance 400 ( $^1\text{H}$ : 400 MHz,  $^{13}\text{C}$ : 100 MHz) and Varian NMR System 600 ( $^1\text{H}$ : 600 MHz,  $^{13}\text{C}$ : 150 MHz) spectrometers at 20 °C; chemical shifts are given in ppm ( $\delta$ ) relative to TMS ( $\delta = 0.00$  ppm). Unambiguous proton NMR assignments were established by  $\{^1\text{H}, ^1\text{H}\}$ -COSY, HSQC and HMBC experiments. Elemental microanalysis of the new compound was performed with a HEKAtech EuroEA combustion analyzer by Mr. H. Bodenstedt (Organische Chemie I, Universität Siegen). TLC analyses were performed on silica gel sheets (Macherey-Nagel Polygram Sil G/UV254), eluent:  $\text{CHCl}_3/\text{MeOH}/\text{AcOH}$  90:10:1, v/v. Ion exchange resin was purchased from SERVA Electrophoresis (DOWEX<sup>®</sup> 1  $\times$  8, 50–100 mesh, pract. grade, Cl-form). Purified water with resistivity  $\geq 18 \text{ M}\Omega \text{ cm}^{-1}$  was used for spectrometric measurements. 9-Fluoroacridizinium bromide, 9-aminoacridizinium chloride and 1,4-dioxa-7,13-dithia--10-aza-cyclopentadecane were prepared according to literature procedures.<sup>1</sup>

### Synthesis of 9-(1',4'-dioxo-7',13'-dithia-10'-azacyclopentadecyl)acridizinium (1c).

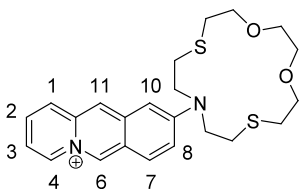

A solution of 9-fluoroacridizinium bromide (417 mg, 1.50 mmol) and 1,4-dioxo-7,13-dithia-10-azacyclopentadecane (754 mg, 3.00 mmol) in EtOH (5 mL) was stirred under reflux for 5 h (TLC control, CHCl<sub>3</sub>/MeOH/AcOH 90:10:1,  $R_f$  = 0.3) and cooled to room temp. The reaction mixture was passed through a chloride-saturated ion-exchange resin. The product was obtained as orange prisms by crystallization from the solution at 4 °C. The crystals were collected and washed with ethyl acetate (EtOAc) and diethyl ether to give the product **1c** (330 mg, 47%) as chloride salt. An analytically pure sample was obtained by recrystallization from MeOH/EtOAc. M.p. 227-229 °C. <sup>1</sup>H-NMR (400 MHz, CD<sub>3</sub>OD):  $\delta$  = 2.82 (t, <sup>3</sup> $J$  = 5 Hz, 4H, CH<sub>2</sub>), 3.02 (t, <sup>3</sup> $J$  = 8 Hz, 4H, CH<sub>2</sub>), 3.67 (s, 4H, CH<sub>2</sub>), 3.80 (t, <sup>3</sup> $J$  = 5 Hz, 4H, CH<sub>2</sub>), 4.00 (t, <sup>3</sup> $J$  = 8 Hz, 4H, CH<sub>2</sub>), 7.05 (d, <sup>4</sup> $J$  = 2 Hz, 1H, CH<sub>ar</sub>, H-10), 7.37-7.43 (m, 1H, CH<sub>ar</sub>, H-3), 7.60-7.71 (m, 2H, CH<sub>ar</sub>, H-2, H-8), 8.02 (dd, <sup>3</sup> $J$  = 9 Hz, <sup>4</sup> $J$  = 1 Hz, 1H, CH<sub>ar</sub>, H-1), 8.19 (d, <sup>3</sup> $J$  = 10 Hz, 1H, CH<sub>ar</sub>, H-7), 8.32 (s, 1H, CH<sub>ar</sub>, H-11), 8.71 (d, <sup>3</sup> $J$  = 7 Hz, 1H, CH<sub>ar</sub>, H-4), 9.60 (s, 1H, CH<sub>ar</sub>, H-6); <sup>13</sup>C-NMR (100 MHz, CD<sub>3</sub>OD):  $\delta$  = 30.7 (2CH<sub>2</sub>), 32.9 (2CH<sub>2</sub>), 53.5 (2CH<sub>2</sub>), 71.7 (2CH<sub>2</sub>), 75.0 (2CH<sub>2</sub>), 101.7 (CH<sub>ar</sub>), 119.4 (CH<sub>ar</sub>), 120.0 (CH<sub>ar</sub>), 122.1 (C<sub>q</sub>), 123.5 (CH<sub>ar</sub>), 126.8 (CH<sub>ar</sub>), 130.5 (CH<sub>ar</sub>), 131.4 (CH<sub>ar</sub>), 134.3 (CH<sub>ar</sub>), 139.0 (CH<sub>ar</sub>), 139.3 (C<sub>q</sub>), 140.0 (C<sub>q</sub>), 153.3 (C<sub>q</sub>); MS (ESI<sup>+</sup>):  $m/z$  (%) = 429 [ $M$ ]<sup>+</sup>; El. Anal. calcd. (%) for C<sub>23</sub>H<sub>29</sub>ClN<sub>2</sub>O<sub>2</sub>S<sub>2</sub> × H<sub>2</sub>O (483.09): C, 57.18; H, 6.47; N, 5.80; S, 13.28. Found C, 57.02; H, 6.54; N, 5.81; S, 12.85. The corresponding perchlorate salt was obtained by the addition of a saturated aqueous solution of NaClO<sub>4</sub> (5 mL) to the aqueous solution of the chloride salt, and subsequent recrystallization of the precipitate from CH<sub>3</sub>CN/EtOAc: Yellow prisms; m.p. 177-179 °C; El. Anal. calcd. (%) for C<sub>23</sub>H<sub>29</sub>ClN<sub>2</sub>O<sub>2</sub>S<sub>2</sub> (529.07): C, 52.21; H, 5.52; N, 5.29; S, 12.12. Found C, 52.19; H, 5.56; N, 5.22; S, 11.79.

**Spectrophotometric measurements.** Absorption spectra were recorded on a Varian Cary 100 double-beam spectrophotometer; emission spectra were recorded on a Varian Cary Eclipse fluorescence spectrophotometer. All spectrophotometric measurements were performed in thermostated quartz sample cells at 20 °C. Solutions for analysis were prepared by dilution of stock solutions ( $1.0 \times 10^{-3}$  M in water) immediately before the experiments. The solution concentrations were 50  $\mu$ M for absorption spectroscopy and 10  $\mu$ M for fluorescence spectroscopy. Spectrophotometer slit widths were kept 2 nm for absorption spectroscopy and 5/5 nm for emission spectroscopy. The aliquots of Hg(OAc)<sub>2</sub> solution containing the appropriate concentration of compound **1c** (to avoid dilution effects) were added to a cuvette containing a constant amount of compound **1c** in water and analyzed photometrically. The titration was continued until no further changes in the spectrum were observed. Spectrofluorimetric titrations were performed just as described for the spectrophotometric titrations with  $c(\mathbf{1c}) = 10 \mu\text{M}$ . In control experiments with other metal cations the concentration of the ligand **1c** and of the metals was  $c = 10 \mu\text{M}$ . The excitation wavelength corresponded to the isosbestic point determined from the UV/Vis titrations.

For control experiments, all solutions of metal salts were prepared by dilution of freshly prepared stock solutions ( $1.0 \times 10^{-2}$  M in water) to the appropriate concentrations. The salts employed were Ca(ClO<sub>4</sub>)<sub>2</sub>, Cd(ClO<sub>4</sub>)<sub>2</sub>, Zn(ClO<sub>4</sub>)<sub>2</sub>, Ni(ClO<sub>4</sub>)<sub>2</sub>, Cr(ClO<sub>4</sub>)<sub>3</sub>, Cu(OAc)<sub>2</sub>, Pb(NO<sub>3</sub>)<sub>2</sub>, Co(ClO<sub>4</sub>)<sub>2</sub>, Fe(ClO<sub>4</sub>)<sub>3</sub>, and AgClO<sub>4</sub>.

All spectrophotometric measurements were performed at least three times to ensure reproducibility.

**Table S1.** Absorption and Emission Properties of **1c** in Water and Acetonitrile

| Solvent          | $\lambda_{\text{abs}}^a$ | $\lg \varepsilon^b$ | $\lambda_{\text{fl}}^c$ | $\phi_{\text{fl}}^d$ |
|------------------|--------------------------|---------------------|-------------------------|----------------------|
| H <sub>2</sub> O | 399                      | 4.29                | 523                     | 0.22                 |
| MeCN             | 402                      | 4.33                | 531                     | 0.27                 |

<sup>a</sup>Long-wavelength absorption maximum, in nm;  $c = 50 \mu\text{M}$ ; <sup>b</sup>extinction coefficient,  $\text{cm}^{-1}\text{M}^{-1}$ ; <sup>c</sup>fluorescent emission maximum,  $c = 10 \mu\text{M}$ ; excitation wavelength  $\lambda_{\text{ex}} = 390$  nm; <sup>d</sup>fluorescence quantum yield relative to Coumarin 153, estimated error  $\pm 10\%$ .

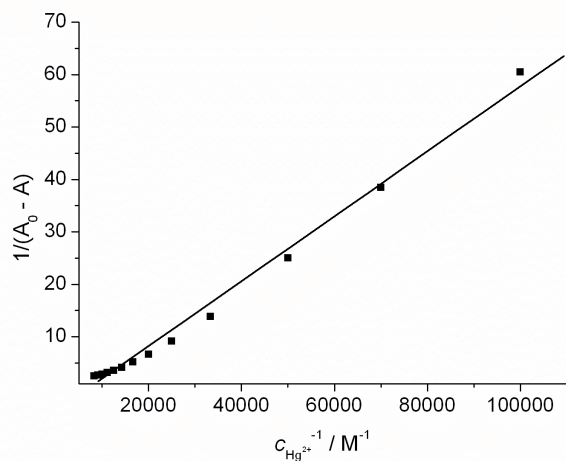

**Figure S1** Benesi-Hildebrand plot from photometric titration of  $\text{Hg}^{2+}$  to **1c** ( $R^2 = 0.990$ ). The resulting association constant is  $1.5 \times 10^4 \text{ M}^{-1}$ . Another independent calculation by computer program SPECFIT gave the association constant of  $1.6 \times 10^4 \text{ M}^{-1.2}$ .

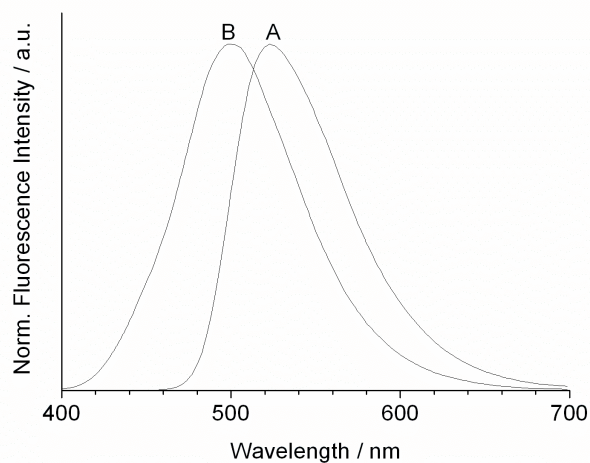

**Figure S2** Normalized fluorescence of **1c** absence (A) and presence (B) of 10 equiv.  $\text{Hg}(\text{OAc})_2$ ;  $c(\mathbf{1c}) = 10 \mu\text{M}$ ,  $\lambda_{\text{ex}} = 388 \text{ nm}$ .

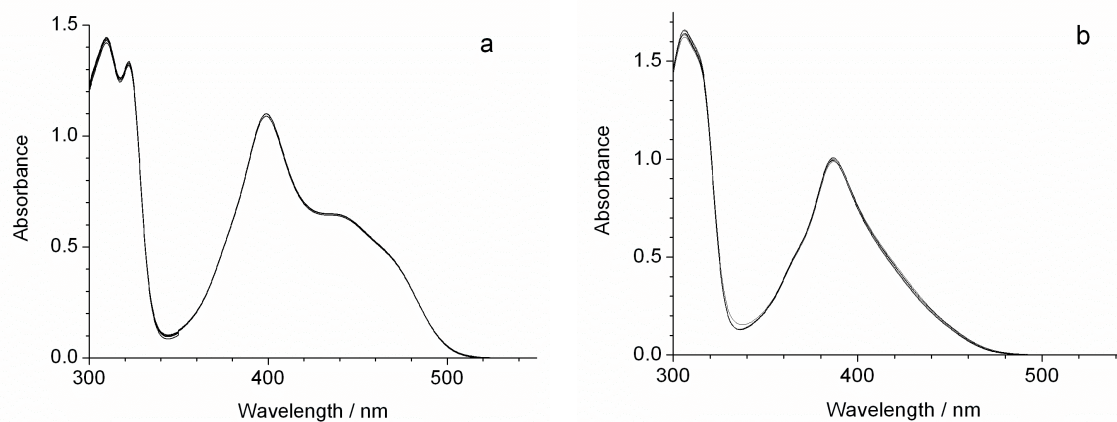

**Figure S3.** a) Absorption spectra of free **1c** ( $50 \mu\text{M}$ ) with different pH (7.1, 5.2, 3.3, 1.6 and 1.1) in Britton-Robinson buffer;<sup>3</sup> b) absorption spectra of **1c** ( $50 \mu\text{M}$ ) in the presence of  $\text{Hg}^{2+}$  ( $0.1 \text{ mM}$ ) with different pH (6.4, 5.9, 5.5, 5.0, 4.5, 4.1, 3.6 and 3.1) in acetate buffer ( $50 \text{ mM}$ ).

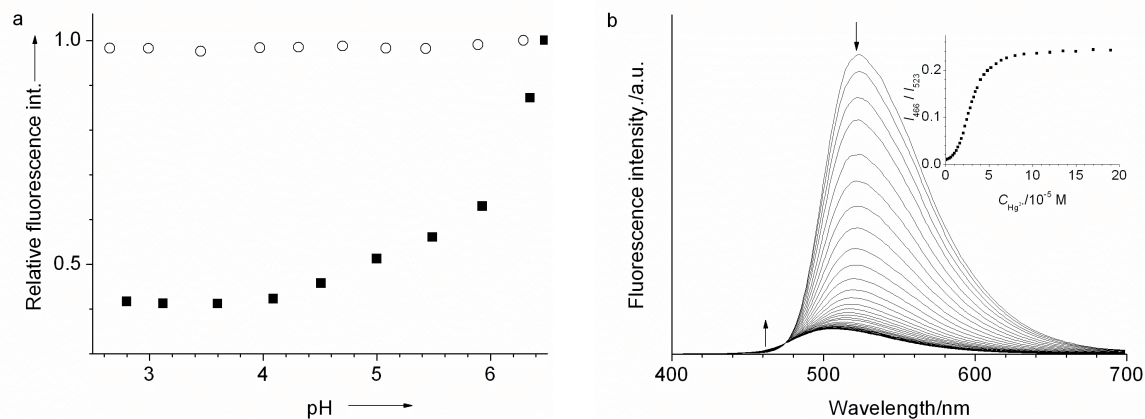

**Figure S4** a) The relative fluorescence intensity of compound **1c** ( $10^{-5}$  M) in the absence ( $\circ$ ) and in the presence ( $\blacksquare$ ) of  $\text{Hg}^{2+}$  (0.1 mM) at different pH values in acetate buffer (50 mM);  $\lambda_{\text{ex}} = 388$  nm,  $\lambda_{\text{em}} = 523$  nm ; b) Spectrofluorimetric titration of an aqueous solution of  $\text{Hg}(\text{OAc})_2$  to compound **1c** at pH 4.0 (acetate buffer 50 mM,  $\lambda_{\text{ex}} = 388$  nm;  $c = 10$   $\mu\text{M}$ ). Arrows on top of the spectra indicate the development of the emission band upon addition of  $\text{Hg}(\text{OAc})_2$ . Inset: the ratiometric analysis of  $I_{466}/I_{523}$  vs  $C_{\text{Hg}^{2+}}$

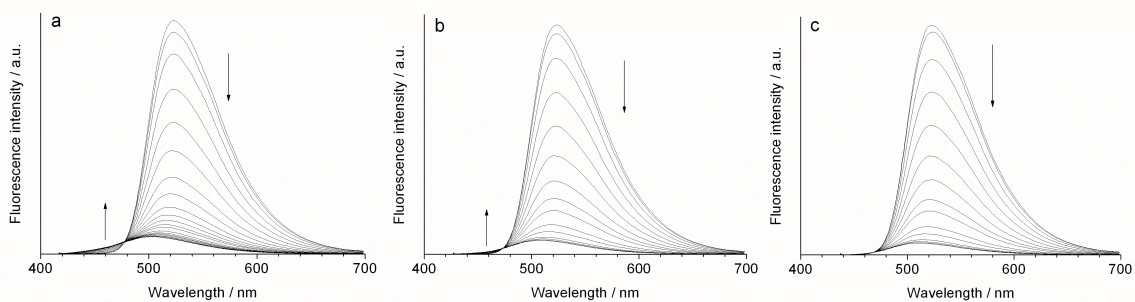

**Figure S5.** Spectrofluorimetric titrations of an aqueous solution of  $\text{Hg}(\text{OAc})_2$  to compound **1c** ( $c = 10$   $\mu\text{M}$ ) with different excitation wavelength (a:  $\lambda_{\text{ex}} = 410$  nm; b:  $\lambda_{\text{ex}} = 420$  nm; c:  $\lambda_{\text{ex}} = 430$  nm); arrows indicate the changes of the fluorescence intensity upon addition of  $\text{Hg}(\text{OAc})_2$ .

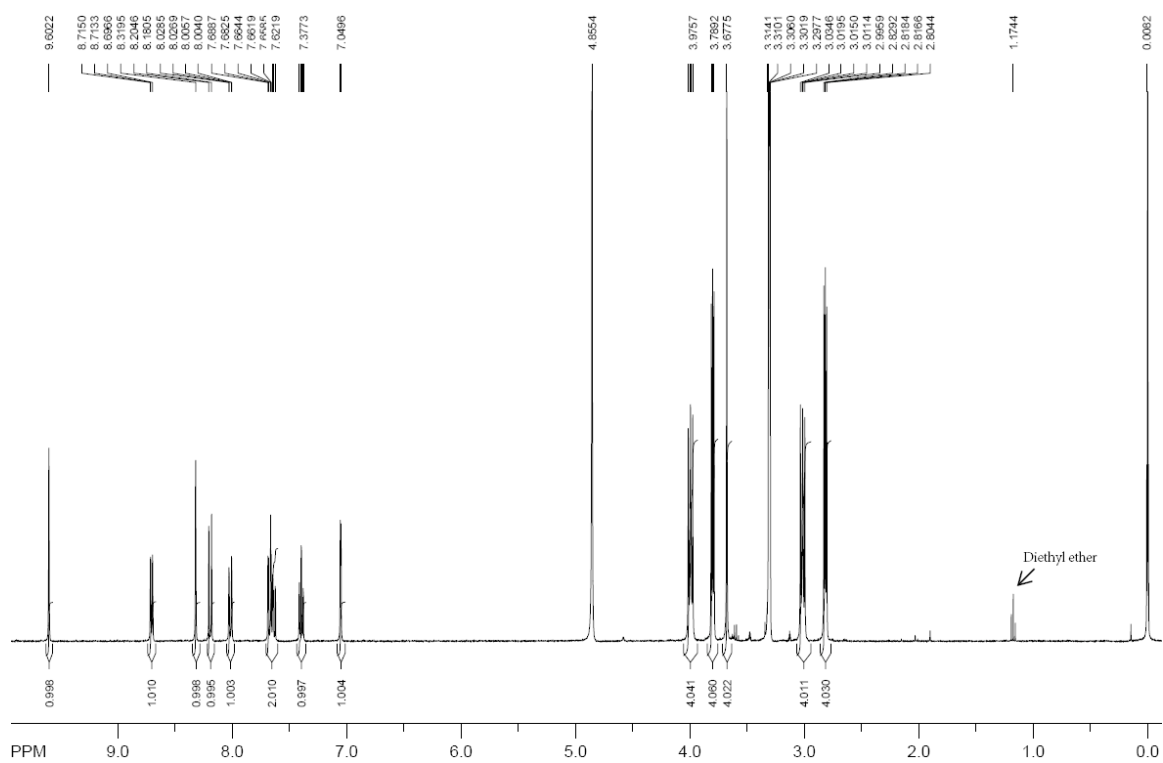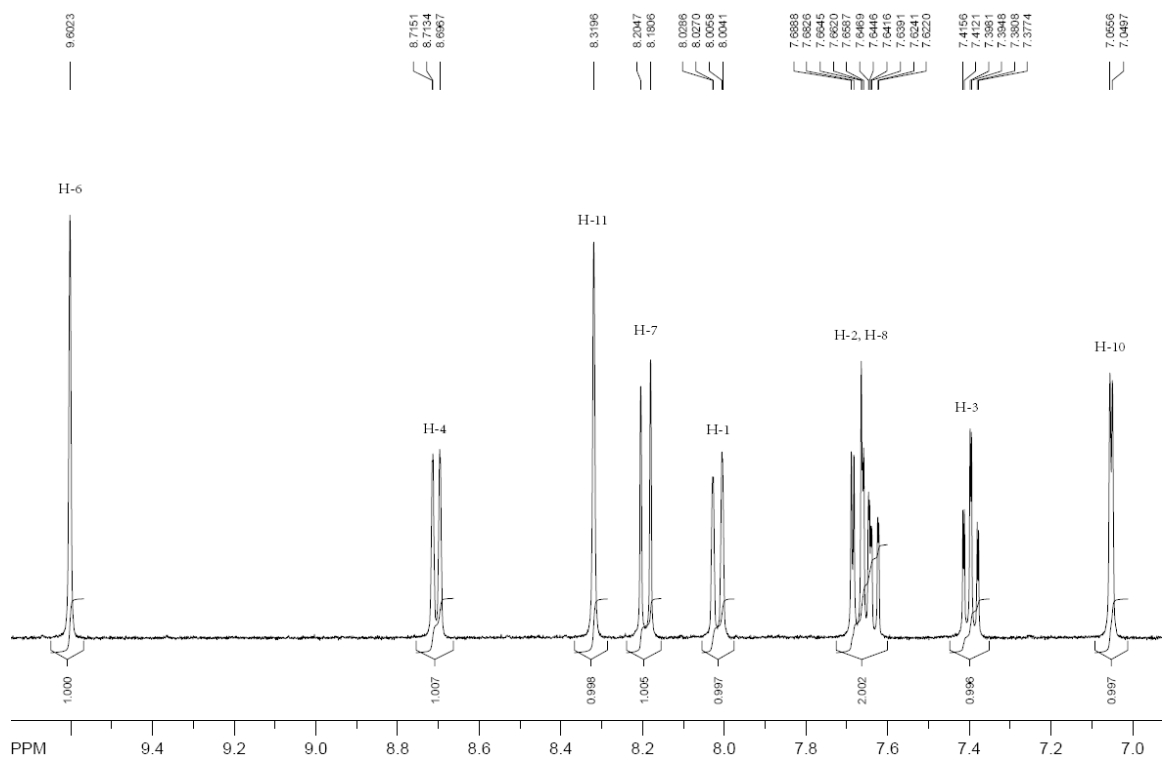

Figure S6.  $^1\text{H}$ -NMR spectrum of **1c** in MeOD

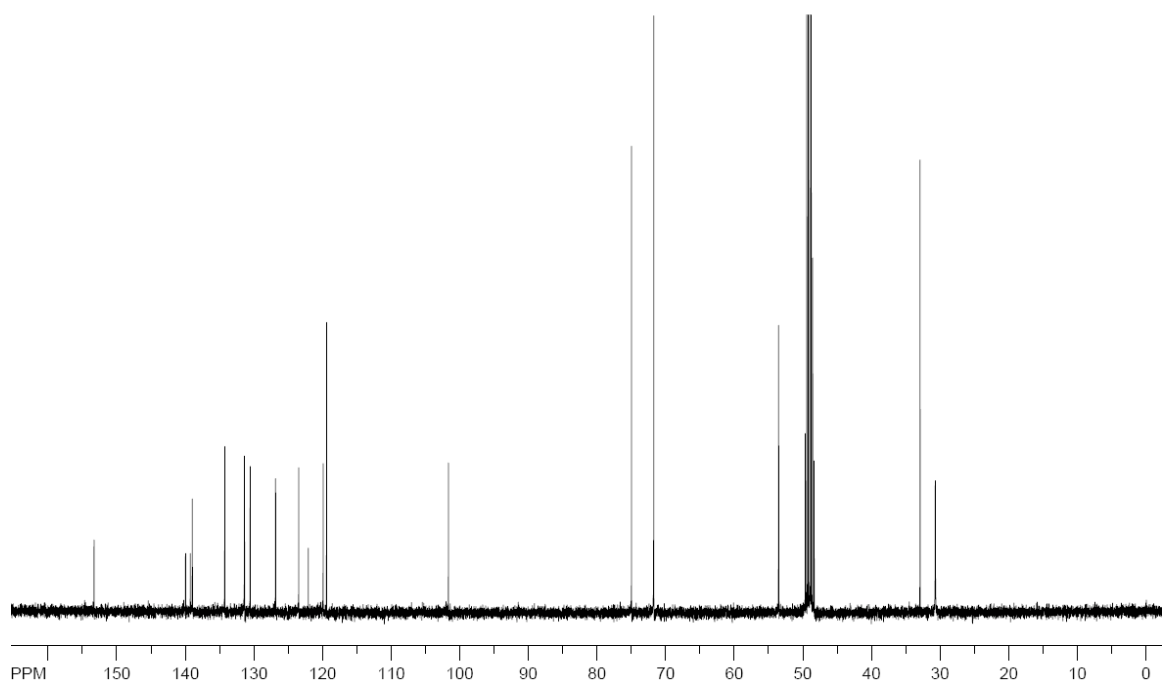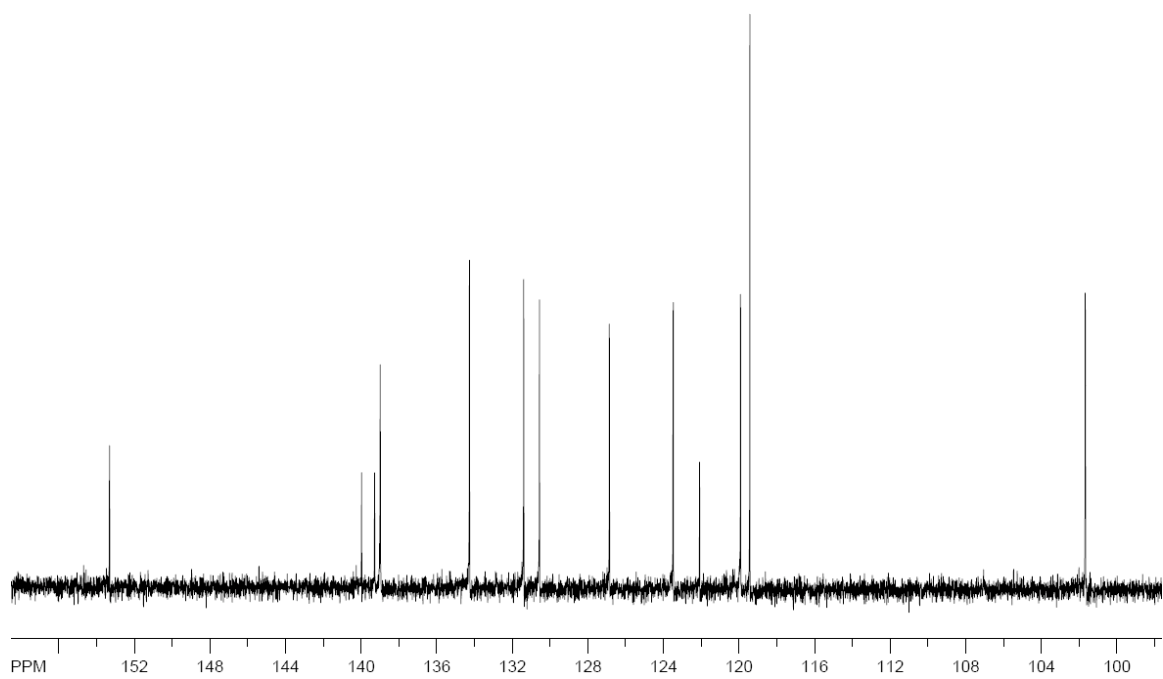

**Figure S7.**  $^{13}\text{C}$ -NMR spectrum of **1c** in MeOD



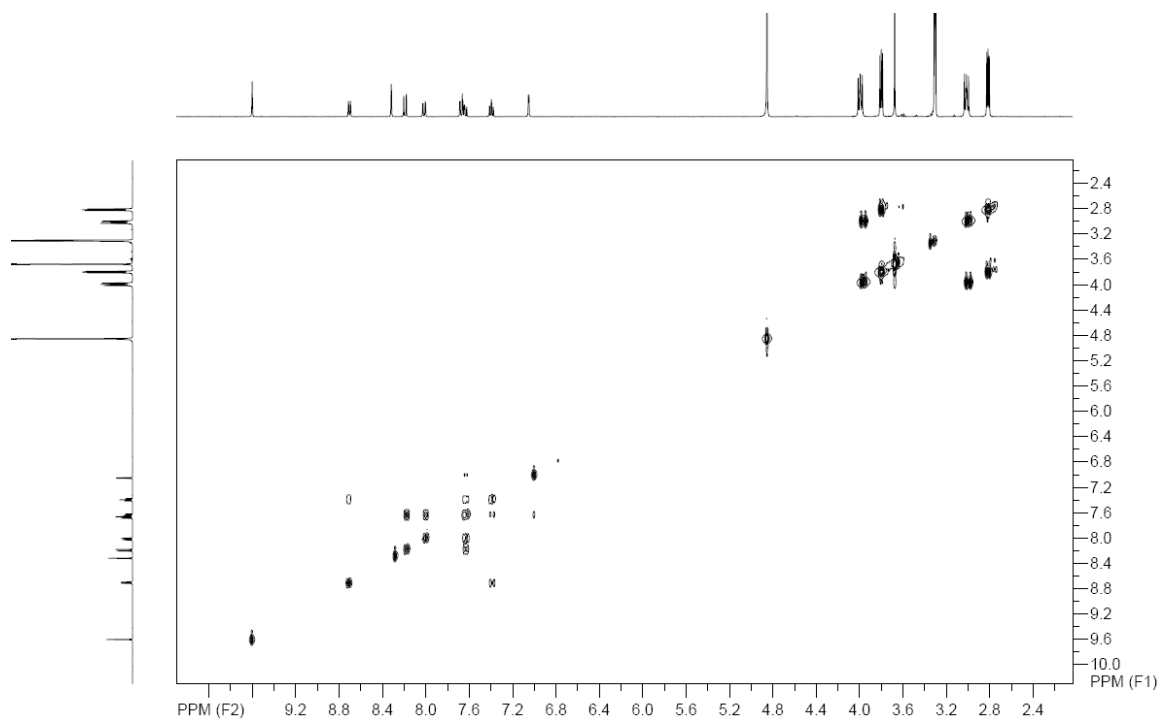

**Figure S8.**  $\{^1\text{H}, ^1\text{H}\}$ -COSY spectrum of **1c** in MeOD

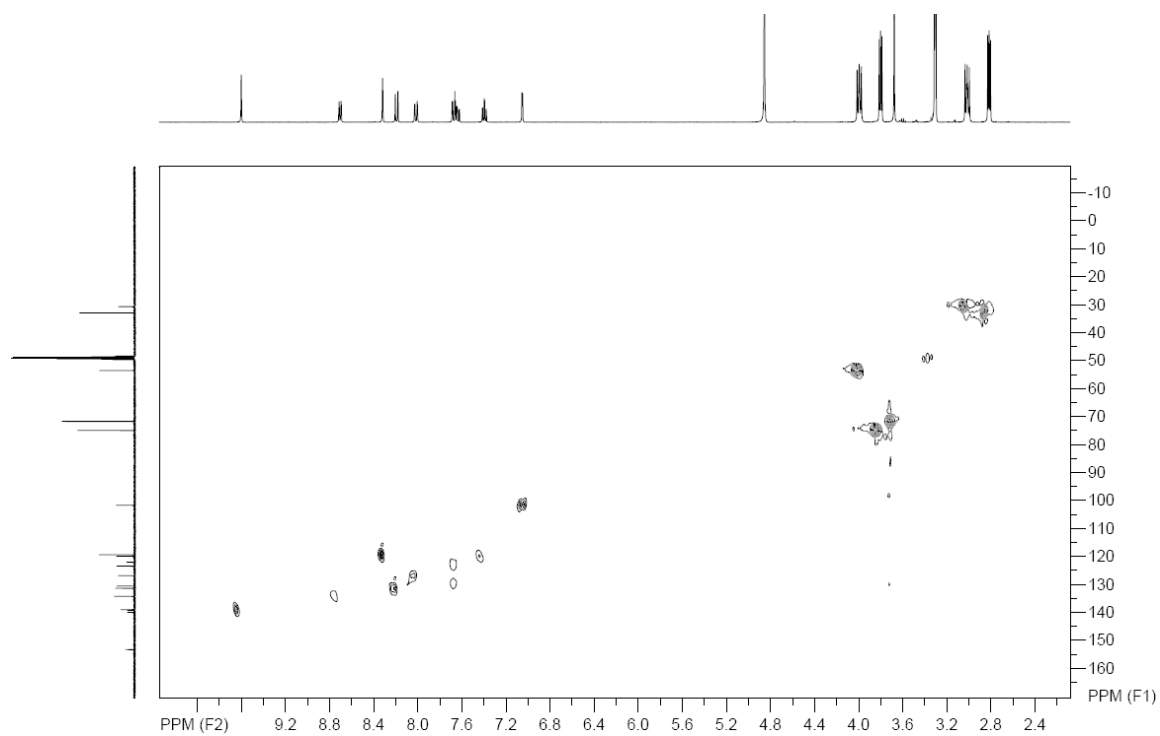

**Figure S9.** HSQC spectrum of **1c** in MeOD

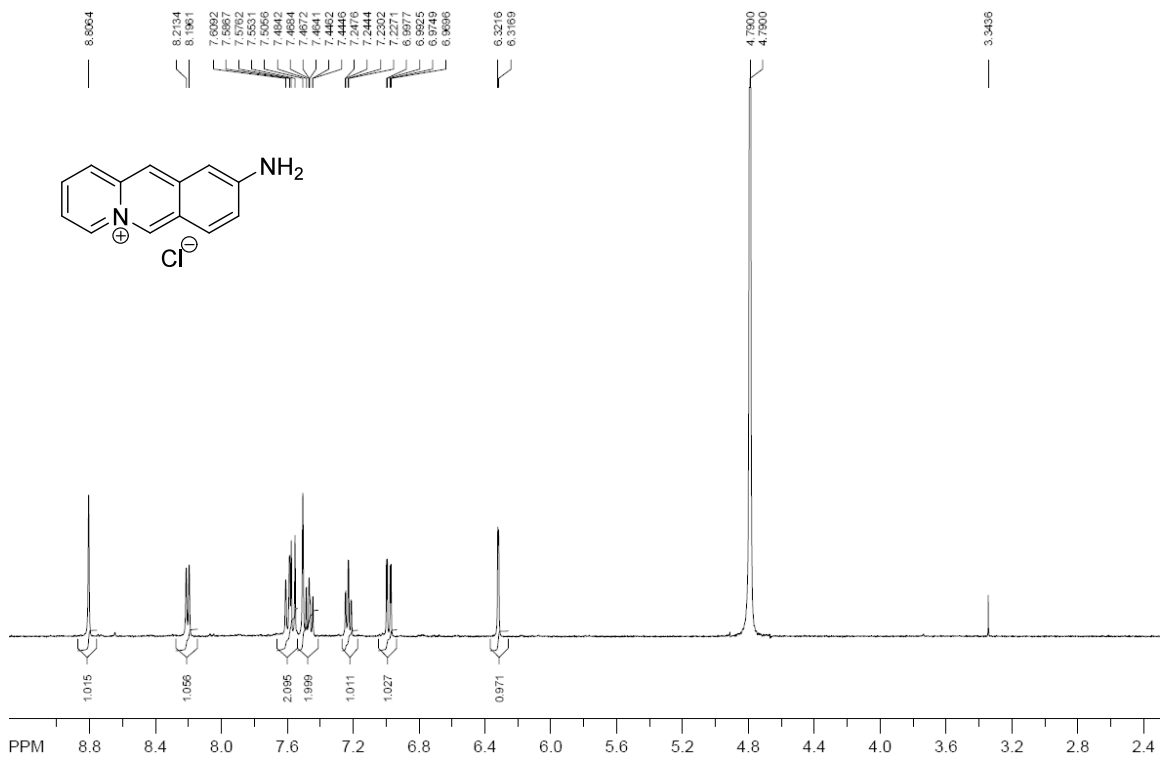

Figure S10. <sup>1</sup>H-NMR spectrum of 9-aminoacridizinium chloride in D<sub>2</sub>O

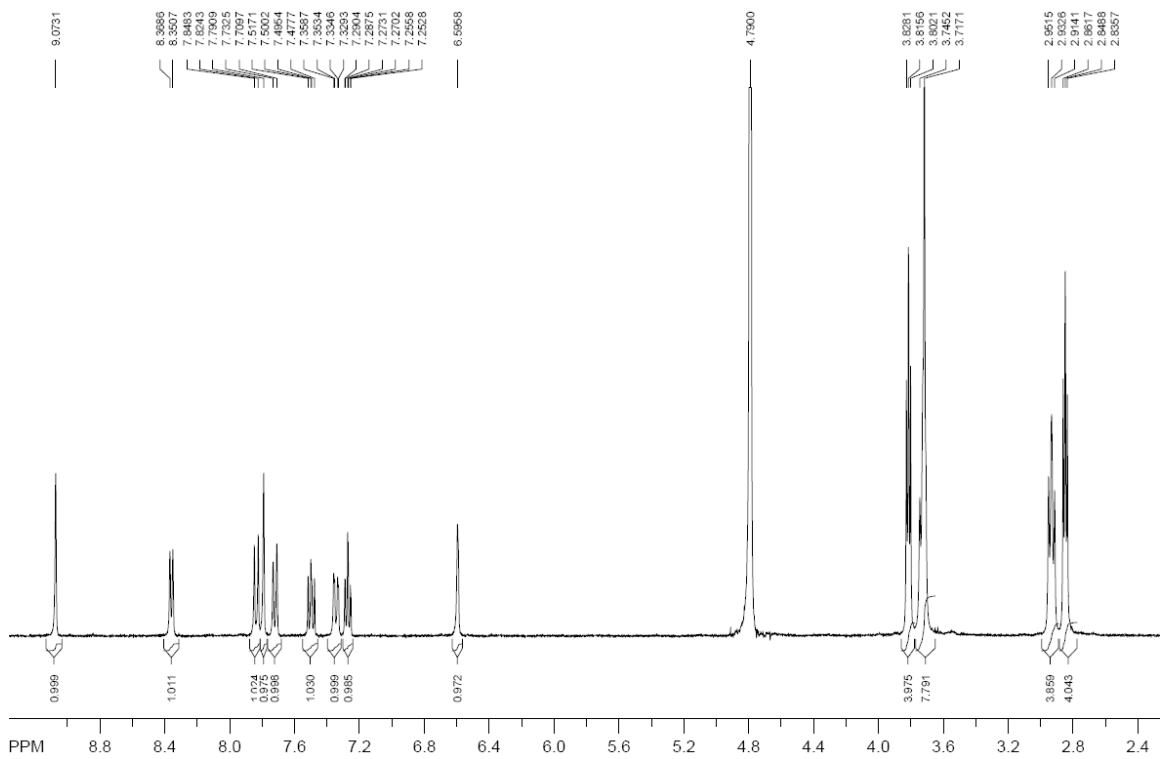

Figure S11 <sup>1</sup>H-NMR spectrum of 1c in D<sub>2</sub>O

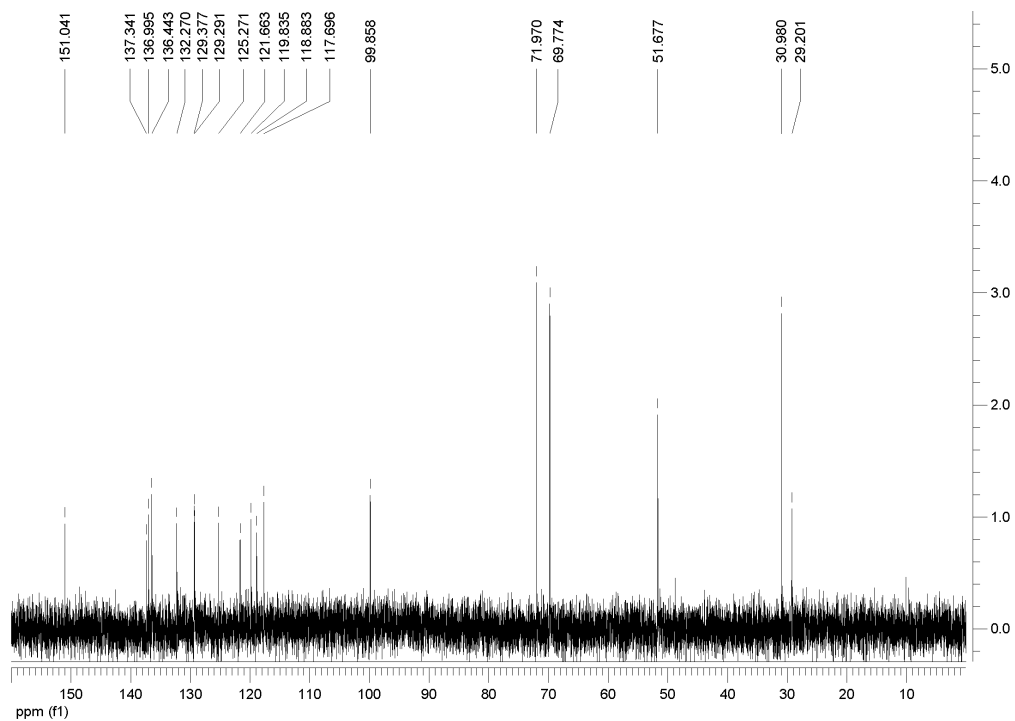

Figure S12.  $^{13}\text{C}$ -NMR spectrum of **1c** in  $\text{D}_2\text{O}$

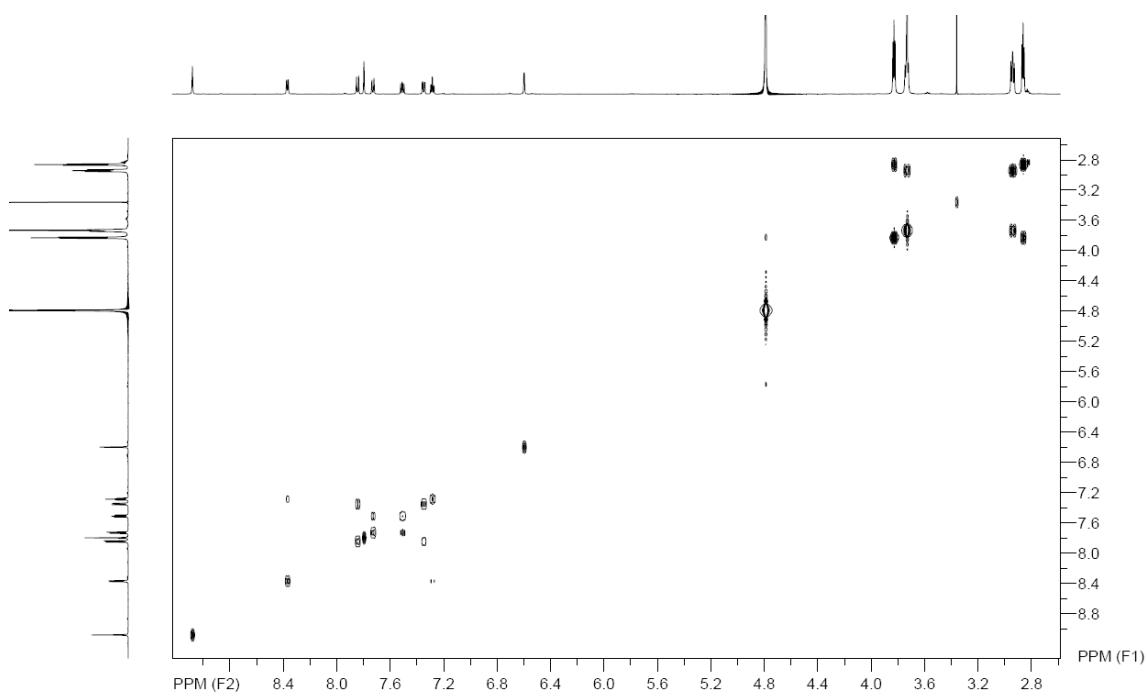

Figure S13.  $\{^1\text{H}, ^1\text{H}\}$ -COSY spectrum of **1c** in  $\text{D}_2\text{O}$

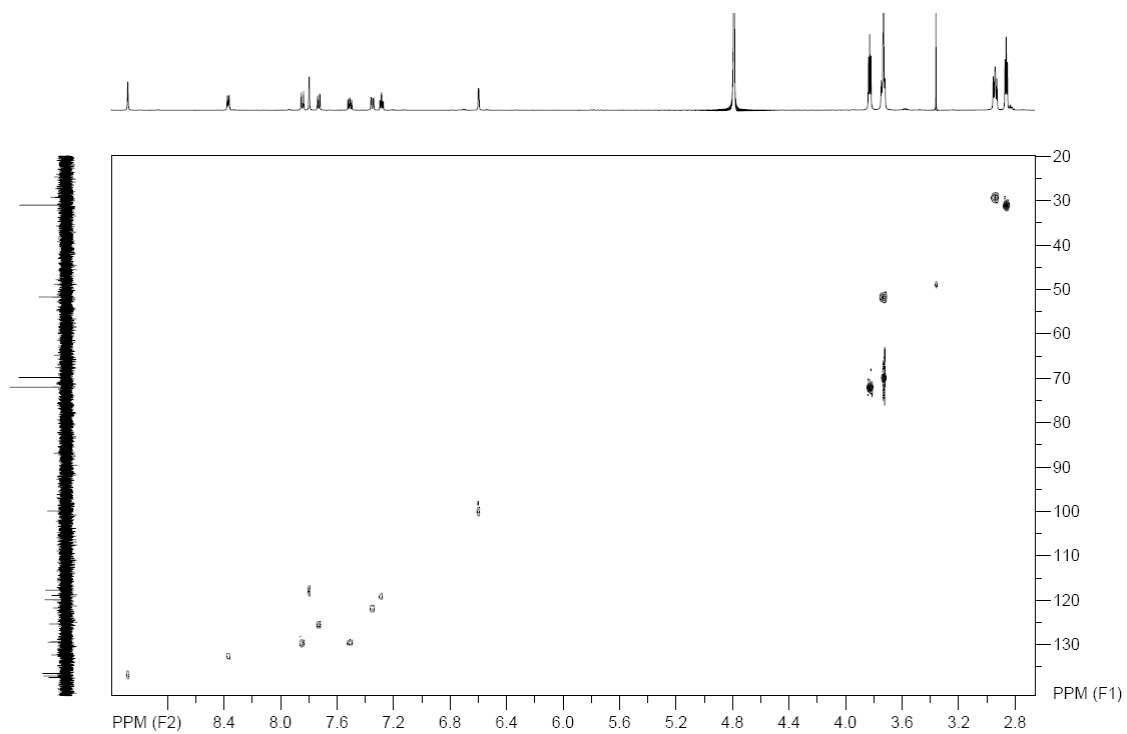

Figure S14. HSQC spectrum **1c** in D<sub>2</sub>O

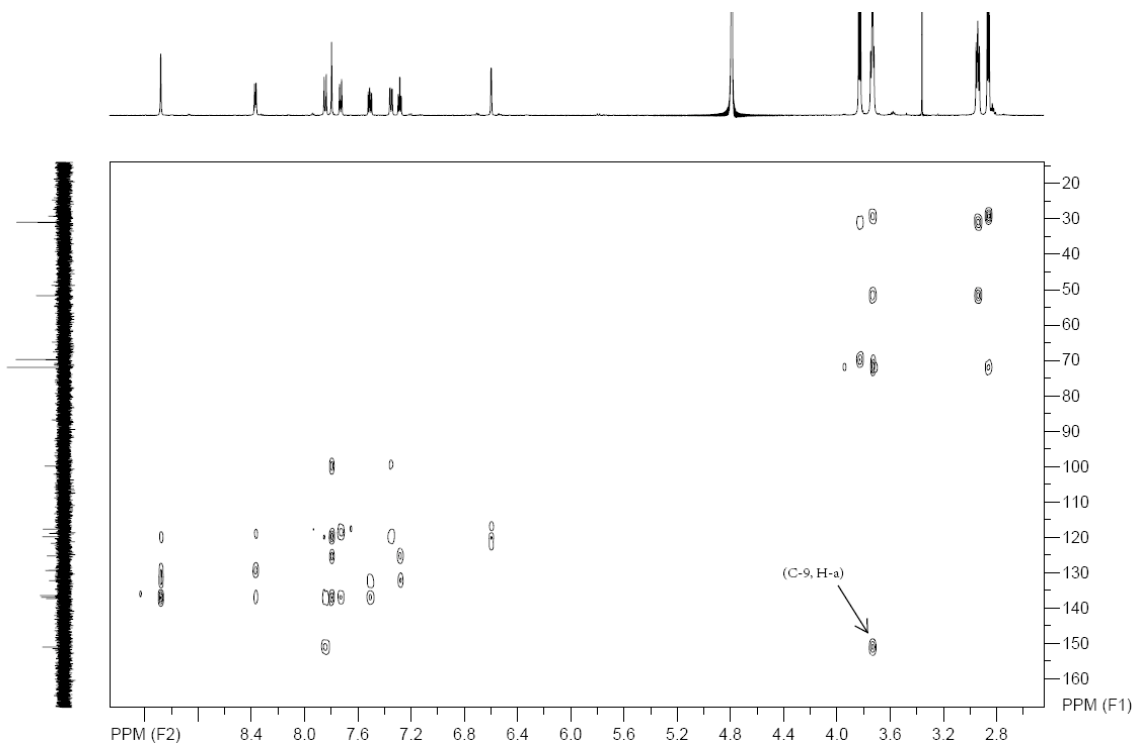

Figure S15. HMBC spectrum **1c** in D<sub>2</sub>O

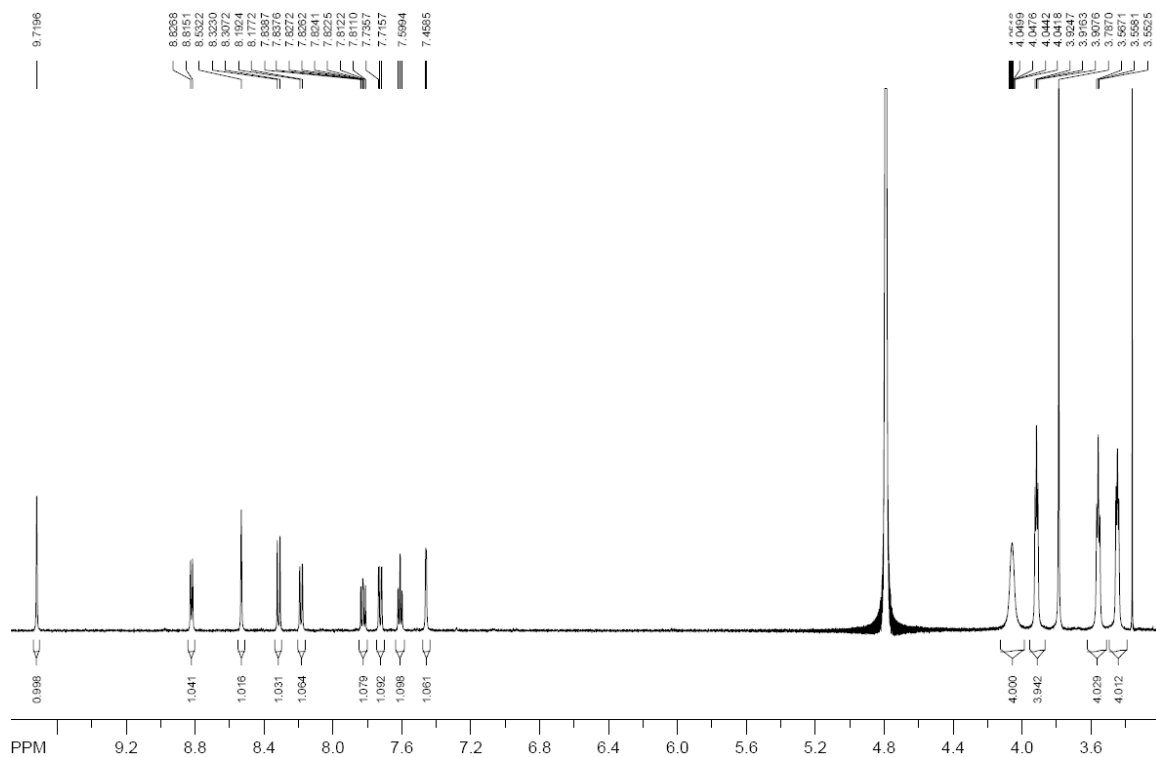

Figure S16.  $^1\text{H}$ -NMR spectrum of **1c** + 1 equiv.  $\text{Hg}(\text{OAc})$  in  $\text{D}_2\text{O}$

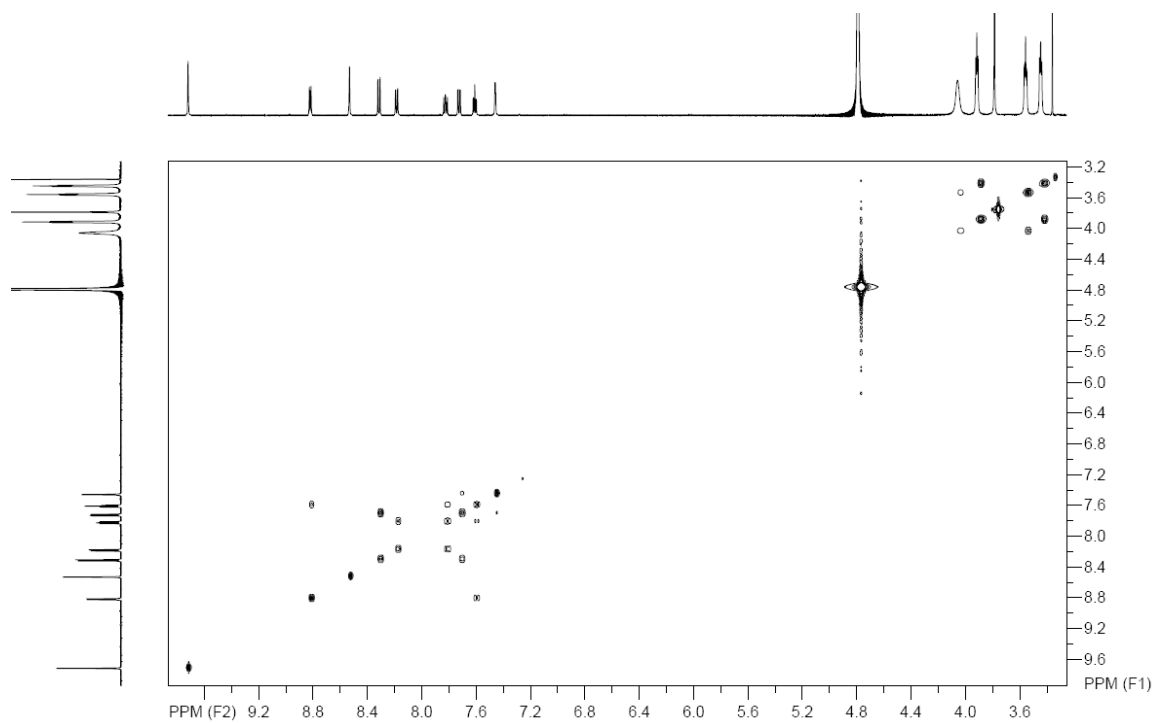

Figure S17.  $\{^1\text{H}, ^1\text{H}\}$ -COSY spectrum of **1c** + 1 equiv.  $\text{Hg}(\text{OAc})$  in  $\text{D}_2\text{O}$

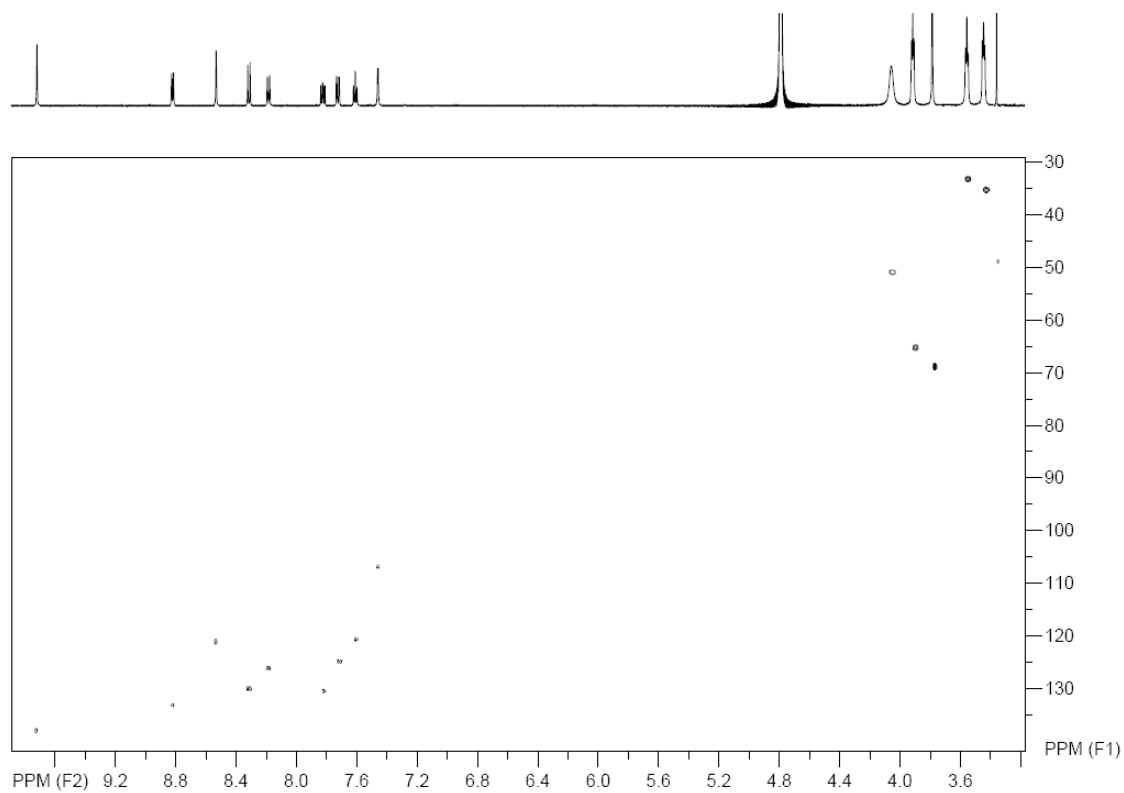

**Figure S18.** HSQC spectrum of **1c** + 1 equiv. Hg(OAc) in D<sub>2</sub>O

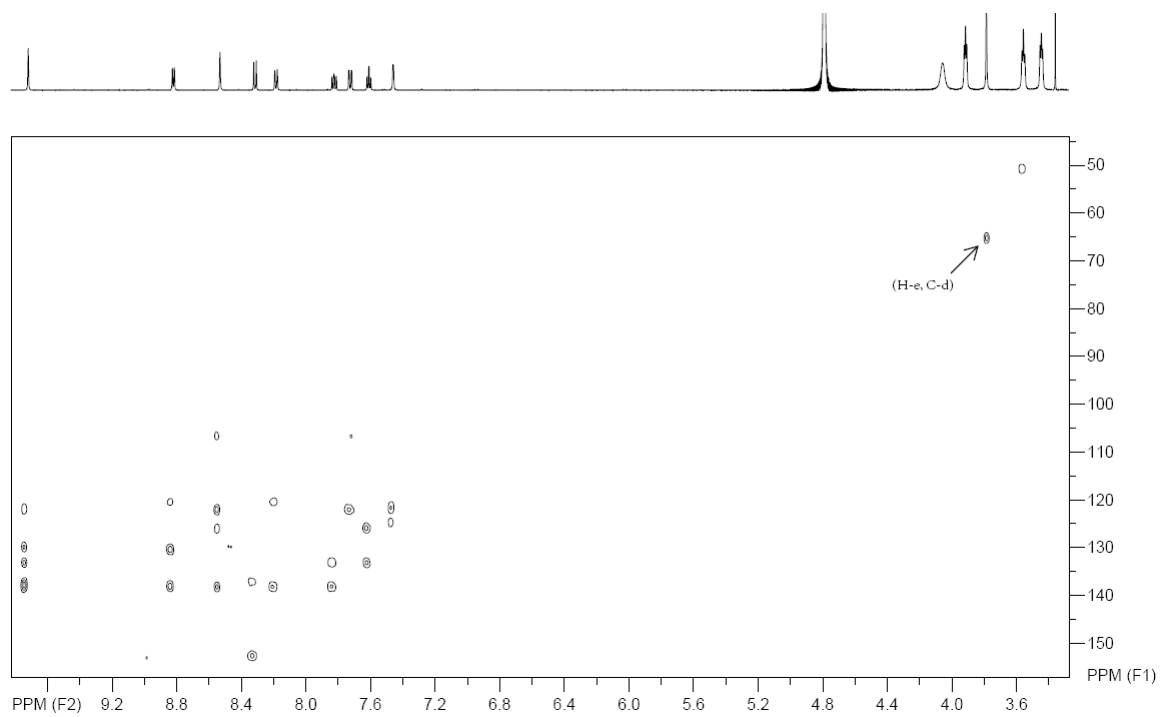

**Figure S19.** HMBC spectrum of **1c** + 1 equiv. Hg(OAc) in D<sub>2</sub>O

---

<sup>1</sup> a) C. K. Bradsher, J. P. Sherer, J. H. Parham, *J. Chem. Eng. Data* **1965**, *10*, 180; b) H. Ihmels, B. Engels, K. Faulhaber, C. Lennartz, *Chem. Eur. J.* **2000**, *6*, 2854; c) M. Tanaka, M. Nakamura, T. Ikeda, K. Ikeda, H. Ando, Y. Shibutani, S. Yajima, K. Kimura, *J. Org. Chem.* **2001**, *66*, 7008.

<sup>2</sup> Association constant was obtained using the computer program SPECFIT, Global Analysis system, Version 3.0.32

<sup>3</sup> Britton, H. T. S.; Robinson, R. A. *J. Chem. Soc.* **1931**, 458.
